# Supplementary material for: Versatile hydrogel towards coupling of energy harvesting and storage for self-powered round-the-clock sensing
Source: Royal Society of Chemistry journal article supplement (doi:10.1039/d4ta06337f), 2024-12-17
Supplement: d4ta06337f1.pdf [file d4ta06337f1.pdf]

## Supporting Information

### Versatile hydrogel towards coupling of energy harvesting and storage for self-powered round-the-clock sensing

Zhuo Wang<sup>a,b</sup>, Quanhong Hu<sup>b,d</sup>, Shaobo Wang<sup>b,d</sup>, Zhirong Liu<sup>b,c</sup>, Chuyu Tang<sup>b,c</sup>, Linlin Li<sup>a,b,c,d</sup> \*

<sup>a</sup>Guangzhou Institute of Blue Energy, Knowledge City, Huangpu District, Guangzhou 510555, China.

<sup>b</sup>Beijing Institute of Nanoenergy and Nanosystems, Chinese Academy of Sciences, Beijing 101400, P. R. China

<sup>c</sup>School of Nanoscience and Technology, University of Chinese Academy of Sciences, Beijing 100049, P. R. China

<sup>d</sup>Center on Nanoenergy Research, Guangxi Colleges and Universities Key Laboratory of Blue Energy and Systems Integration, School of Physical Science & Technology, Guangxi University, Nanning 530004, P. R. China

\*Email address: [lilinlin@binn.cas.cn](mailto:lilinlin@binn.cas.cn)

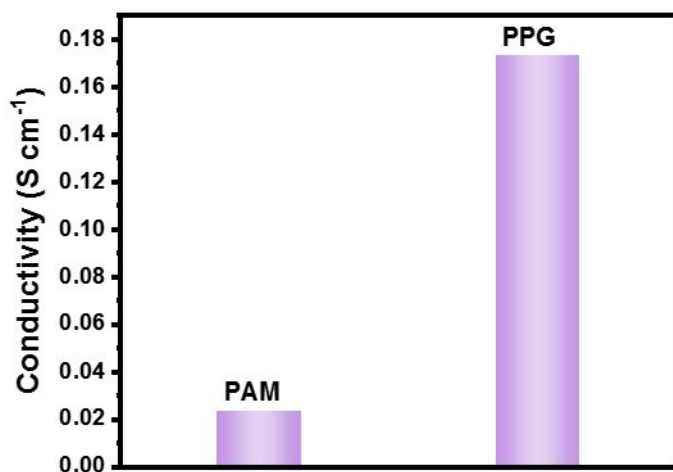

**Figure S1.** Conductivity of the PAM and PPG hydrogels.

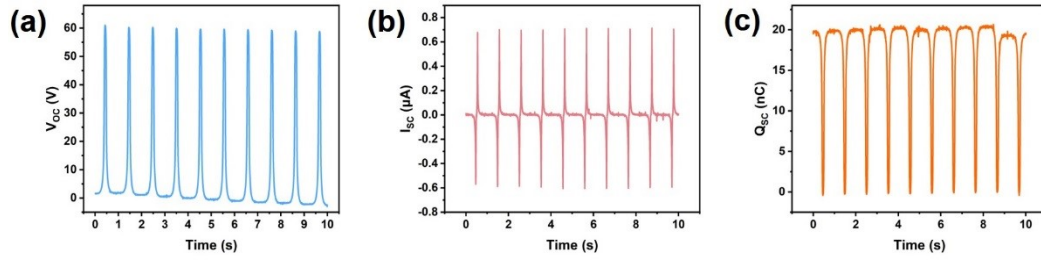

**Figure S2.** Electrical outputs (a)  $V_{oc}$ , (b)  $I_{sc}$  and (c)  $Q_{sc}$  of the TENG using the PAM hydrogel as the electrode.

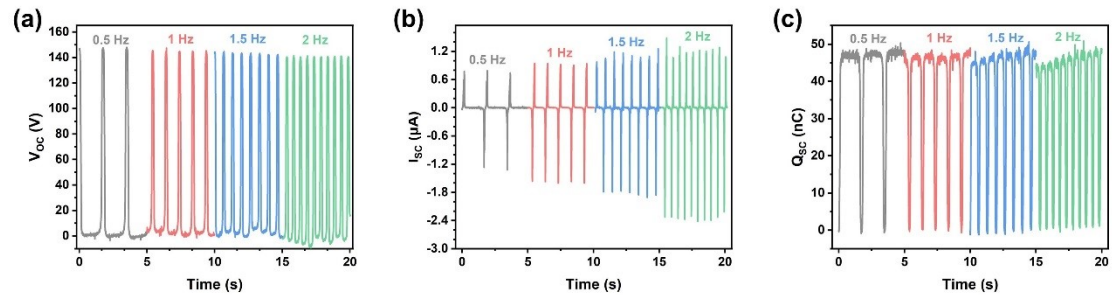

**Figure S3.** (a)  $V_{oc}$ , (b)  $I_{sc}$  and (c)  $Q_{oc}$  of the PPG-TENG under different frequencies.

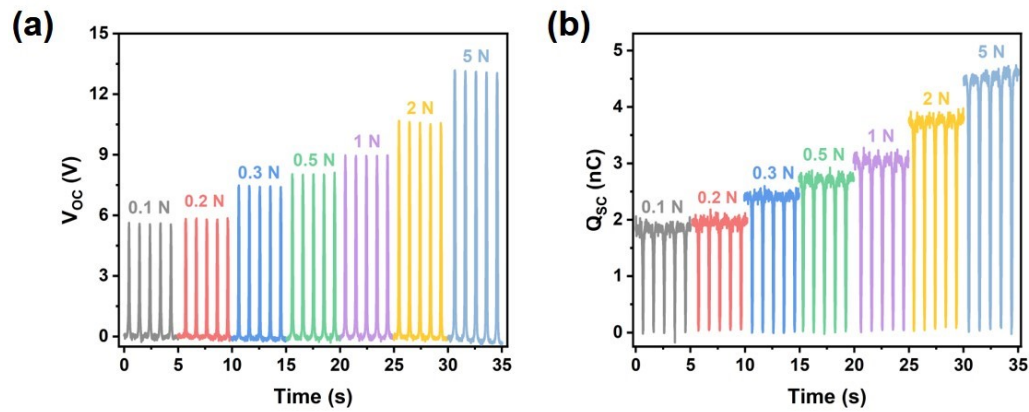

**Figure S4.** (a)  $V_{oc}$  and (b)  $Q_{sc}$  of the PPG-TENG under different mechanical forces.

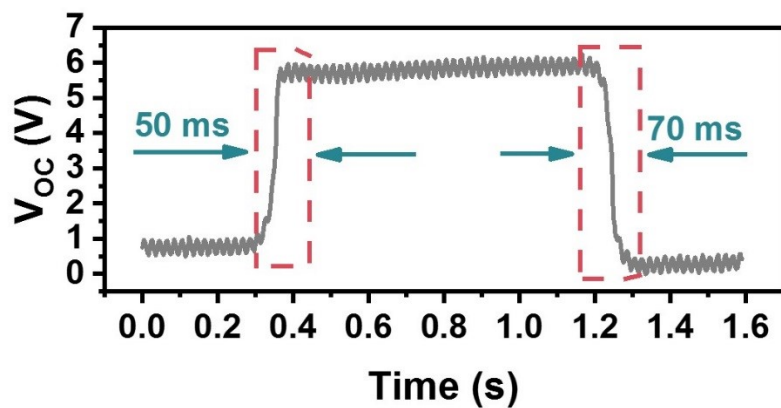

Figure S5. Fast responsive and recovery time of the PPG-TENG.

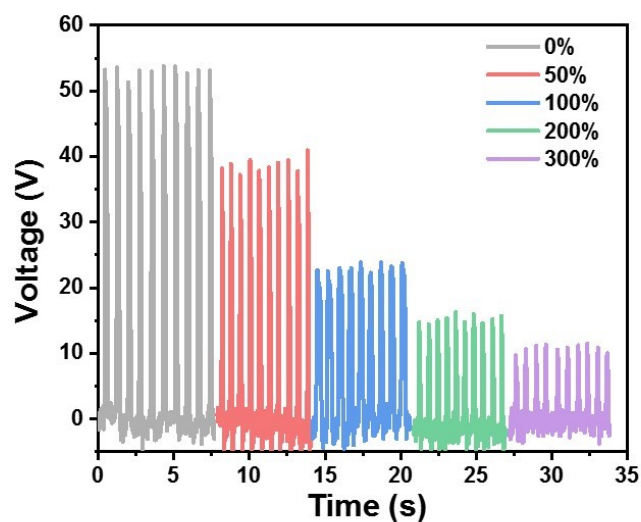

Figure S6.  $V_{oc}$  of PPG-TENG under different strain states.

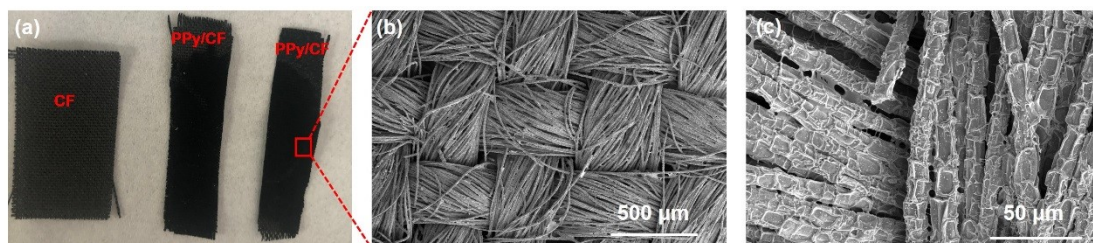

Figure S7. (a) Photograph of carbon fiber (CF) and PPy coated carbon fiber (PPy/CF), (b, c) SEM images PPy/CF with different magnifications.

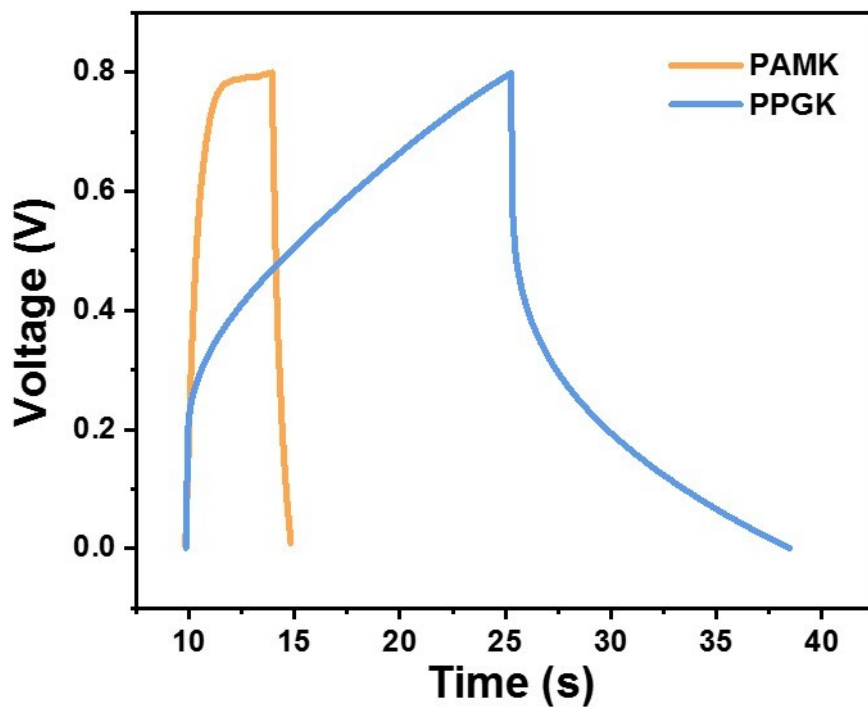

Figure S8. GCD curves of PAMK and PPGK as electrolytes of the SCs.

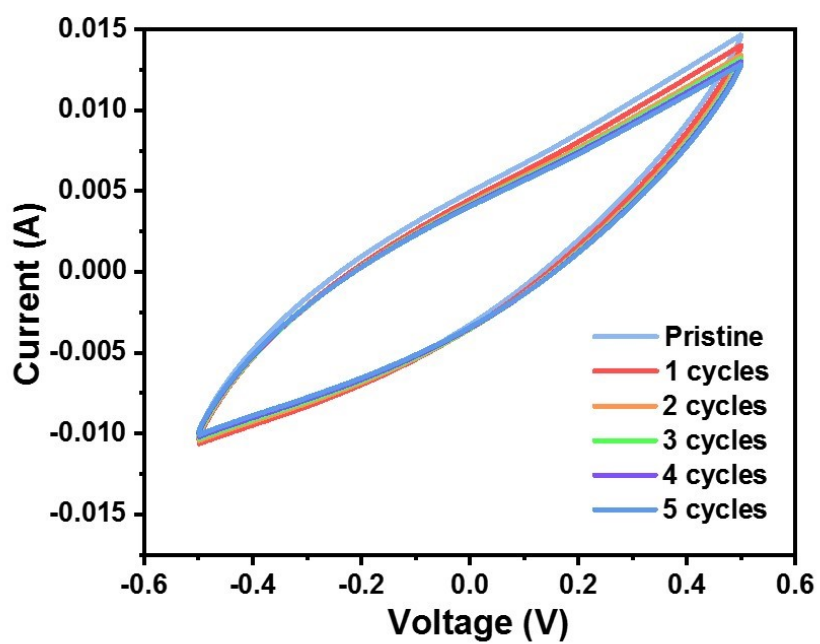

Figure S9 CV curves of the SC after different washing cycles.
